1 **HLA alleles associated with risk of ankylosing spondylitis and rheumatoid arthritis influence**  
2 **the gut microbiome**

3  
4 Mark Asquith PhD<sup>1</sup>

5 Peter R. Sternes PhD<sup>2</sup>

6 Mary-Ellen Costello PhD<sup>2</sup>

7 Lisa Karstens PhD<sup>3</sup>

8 Sarah Diamond PhD<sup>1</sup>

9 Tammy M. Martin PhD<sup>4</sup>

10 Timothy D. Spector PhD<sup>5</sup>

11 Kim-Anh Le Cao PhD<sup>6</sup>

12 James T. Rosenbaum MD<sup>7\*</sup>

13 Matthew A. Brown MBBS, MD<sup>2\*</sup>

14

15 \*These two authors contributed equally to this manuscript.

16

17

18 <sup>1</sup>Division of Arthritis and Rheumatic Diseases, Department of Ophthalmology, Oregon Health and Science  
19 University, Portland, USA.

20

21 <sup>2</sup>Translational Genomics Group, Institute of Health and Biomedical Innovation at Translational Research  
22 Institute, Queensland University of Technology, Brisbane, Australia.

23

24 <sup>3</sup>Division of Bioinformatics and Computational Biology, Oregon Health and Science University, Portland, OR, USA;  
25 Division of Urogynecology, Oregon Health and Science University, Portland, OR, USA.

26

27 <sup>4</sup>Casey Eye Institute, Oregon Health & Science University, Portland, OR, USA.

28

29 <sup>5</sup>Department of Twin Research and Genetic Epidemiology, King's College London, London, UK.

30

31 <sup>6</sup>Melbourne Integrative Genomics and School of Mathematics and Statistics, University of Melbourne,  
32 Melbourne, Victoria, Australia.

33

34 <sup>7</sup>Departments of Ophthalmology, Medicine, and Cell Biology, Oregon Health & Sciences University and  
35 Department Chair, Legacy Devers Eye Institute, both in Portland, OR, USA.

36

37

38 Corresponding Author:

39

40 Professor Matthew A. Brown,  
41 Institute of Health and Biomedical Innovation,  
42 Queensland University of Technology,  
43 Translational Research Institute,  
44 Princess Alexandra Hospital,  
45 Woolloongabba, Brisbane,  
46 Australia.

47 Telephone: +61 7 3443 7366

48 Fax : +61 7 3443 7102

49 matt.brown@qut.edu.au

50

51 **ABSTRACT**

52 **Objectives.** HLA alleles affect susceptibility to more than 100 diseases, but the mechanisms to account  
53 for these genotype-disease associations are largely unknown. HLA-alleles strongly influence  
54 predisposition to ankylosing spondylitis (AS) and rheumatoid arthritis (RA). Both AS and RA patients  
55 have discrete intestinal and faecal microbiome signatures. Whether these changes are cause or  
56 consequence of the diseases themselves is unclear. To distinguish these possibilities, we examine the  
57 effect of *HLA-B27* and *HLA-DRB1* RA-risk alleles on the composition of the intestinal microbiome in  
58 healthy individuals.

59

60 **Methods.** 568 samples from 6 intestinal sites were collected from 107 otherwise healthy unrelated  
61 subjects and stool samples from 696 twin pairs from the TwinsUK cohort. Microbiome profiling was  
62 performed using sequencing of the 16S rRNA bacterial marker gene. All patients were genotyped using  
63 the Illumina CoreExome SNP microarray, and HLA genotypes were imputed from these data.

64

65 **Results.** Association was observed between *HLA-B27* genotype, and RA-risk *HLA-DRB1* alleles, and  
66 overall microbial composition ( $P=0.0002$  and  $P=0.00001$  respectively). These associations were  
67 replicated in the TwinsUK cohort stool samples ( $P=0.023$  and  $P=0.033$  respectively).

68

69 **Conclusions.** This study shows that the changes in intestinal microbiome composition seen in AS and  
70 RA are at least partially due to effects of *HLA-B27* and *-DRB1* on the gut microbiome. These findings  
71 support the hypothesis that HLA alleles operate to cause or increase the risk of these diseases through  
72 interaction with the intestinal microbiome, and suggest that therapies targeting the microbiome may  
73 be effective in their prevention and/or treatment.

74

75 **Keywords**

76 Ankylosing spondylitis, rheumatoid arthritis, microbiome.

77 **INTRODUCTION**

78 HLA molecules affect susceptibility to many diseases, but in the majority of cases the mechanism by  
79 which HLA molecules predispose to disease remains a mystery. The risks of developing both ankylosing  
80 spondylitis (AS) and rheumatoid arthritis are primarily driven by genetic effects, with heritability >90%  
81 (1, 2) for AS, and 53-68% for RA (3, 4). In both diseases HLA alleles are the major susceptibility factors,  
82 with AS being strongly associated with *HLA-B27*, and RA with *HLA-DRB1* 'shared-epitope' (SE) alleles.

83  
84 Particularly in AS, there is strong evidence of a role for gut disease in disease pathogenesis. Up to an  
85 estimated 70% of AS patients have either clinical or subclinical gut disease, suggesting that intestinal  
86 inflammation may play a role in disease pathogenesis (5, 6). Increased gut permeability has been  
87 demonstrated in both AS patients and their first-degree relatives compared with unrelated healthy  
88 controls (7-11). Crohn's disease (CD) is closely related to AS with a similar prevalence and high  
89 heritability. The two commonly co-occur with an estimated ~5% of AS patients developing CD, and 4-  
90 10% of CD patients developing AS (12, 13). Strong co-familiality (14), and the extensive sharing of  
91 genetic factors between AS and inflammatory bowel disease (IBD) (15, 16) suggests that they have a  
92 shared aetiopathogenesis. This is consistent with the hypothesis that gut derived immune cells or  
93 microbial products may contribute to spondyloarthritic inflammation (17-19).

94  
95 Using 16S rRNA community profiling we have previously demonstrated that AS cases have a discrete  
96 intestinal microbial signature in the terminal ileum (TI) compared with healthy controls (HC) ( $P < 0.001$ )  
97 (20), a finding that has subsequently been confirmed by other studies (21, 22). We have also  
98 demonstrated that dysbiosis is an early feature of disease in *HLA-B27* transgenic rats, preceding the  
99 onset of clinical disease in the gut or joints (23). Similarly, RA cases have also been shown to have gut  
100 dysbiosis (24, 25), and animal models of RA such as collagen-induced arthritis have been shown to be  
101 influenced by the gut microbiome (26, 27). In these studies it is difficult to distinguish between effects

102 of the immunological processes going on in the intestinal wall in cases, and the effects of treatments  
103 on the intestinal microbiome, from potential effects of the gut microbiome on the disease.

104

105 The role of the host genetics in shaping intestinal microbial community composition in humans is  
106 unclear. In animal models, host gene deletions have been shown to result in shifts in microbiota  
107 composition (28). In addition, a recent quantitative trait locus mapping study in an inter-cross murine  
108 model, linked specific genetic polymorphisms with microbial abundances (29). Large scale studies in  
109 twins (n=1126 twin pairs) have demonstrated that of 945 widely shared taxa, 8.8% showed significant  
110 heritability, with some taxa having heritability of >40% (e.g. family *Christensenellaceae*, heritability  
111 42%) (30).

112

113 Further studies are needed into whether the changes in intestinal microbial composition are due to  
114 host genetics, and how this affects the overall function of the gut microbiome in cases, including how  
115 the microbiome then goes on to shape the immune response and influence inflammation. In AS, given  
116 the strong association of *HLA-B27*, the hypothesis has been raised that *HLA-B27* induces AS by effects  
117 on the gut microbiome, in turn driving spondyloarthritis and inducing immunological processes such  
118 as IL-23 production (31, 32). Further experiments comparing the intestinal microbiome of *HLA-B27*  
119 negative and positive patients would shed light of the influence of *HLA-B27* on overall intestinal  
120 microbiome composition, particularly given the work in *HLA-B27* transgenic rats showing that *HLA-*  
121 *B27* was associated with altered ileal, caecal, colonic and fecal microbiota (23, 33, 34). Similar theories  
122 have been proposed with regard to interaction between the gut microbiome and the immunological  
123 processes that drive RA (reviewed in (35)).

124

125 In this study we investigated if AS and RA-associated HLA alleles influence the gut microbiome in  
126 healthy individuals, to support the hypothesis that they influence the risk of developing AS and RA  
127 through effects on the gut microbiome.

128 **METHODS**

129 **Human subjects**

130 A total of 107 subjects, aged 40-75, predominately Caucasian (~90%), typically following an  
131 omnivorous diet (~95%) and were undergoing routine colorectal cancer screening at Oregon Health &  
132 Science University's Center for Health and Healing were included in this study. Individuals were  
133 excluded if they had a personal history of inflammatory bowel disease or colon cancer, prior bowel or  
134 intestinal surgery or were pregnant. All subjects underwent a standard polyethylene glycol bowel prep  
135 the day prior to their colonoscopy procedure. During the procedure, biopsies were collected for  
136 research purposes from the terminal ileum or other tissue sites as indicated. Subjects were instructed  
137 to collect a stool sample on a sterile swab at home, just prior to starting their bowel prep procedure.  
138 Stool samples were brought to the colonoscopy appointment at room temperature. All samples  
139 (biopsies and fecal swabs) were placed at 4°C in the clinic and transported to the lab within 2 hours of  
140 the colonoscopy procedure, where they were snap frozen and stored at -80°C prior to processing.  
141 Patient samples were obtained over a 24-month period.

142

143 Ethical approval for this study was obtained from the Oregon Health & Science University Institutional  
144 Review Board. Written informed consent was obtained from all subjects. This study was performed  
145 subject to all applicable U.S. Federal and State regulations.

146

147 **TwinsUK**

148 All work involving human subjects was approved by the Cornell University IRB (Protocol ID  
149 1108002388). Matched genotyped and stool samples were collected from 1392 twins. Genotyping,  
150 16S rRNA amplicon sequencing, filtering and analysis were performed as described in Goodrich *et al.*,  
151 2014 (36).

152

153

154 **16S rRNA amplicon sequencing and analysis**

155 568 stool and biopsy samples across 107 individuals were extracted and amplified for the bacterial  
156 marker gene 16S rRNA as previously described (20). Samples were demultiplexed and filtered for  
157 quality using the online platform BaseSpace (<http://basespace.illumina.com>). Paired end reads were  
158 joined, quality filtered and analysed using Quantitative Insights Into Microbial Ecology (QIIME) v1.9.1  
159 (37). Operational taxonomy units (OTU) were picked against a closed reference and taxonomy was  
160 assigned using the Greengenes database (gg\_13\_8) (38), clustered at 97% similarity by UCLUST (39)  
161 and low abundance OTUs were removed (<0.01%).

162

163 **Data visualization and statistical analysis**

164 Multidimensional data visualisation was conducted using a sparse partial least squares discriminant  
165 analysis (sPLSDA) on centered log ratio transformed data, as implemented in R as part of the MixOmics  
166 package v6.3.1 (40). Association of the microbial composition with metadata of interest was  
167 conducted using a PERMANOVA test as part of vegan v2.4-5 (41) on arcsine square root transformed  
168 data at species level, taking into account individual identity where multiple sites per individual were  
169 co-analysed, as well as the sources of covariation such as BMI and gender. Alpha diversity was  
170 calculated at species level using the rarefy function as implemented in vegan v2.4-5 and differences  
171 were evaluated using a Wilcoxon rank-sum test. The metagenome functional content was predicted  
172 using PICRUSt v1.1.3 (42) and the resulting predictions were mapped to KEGG pathways using  
173 HUMAnN2 v0.11.1 (43) Differential abundance of bacterial taxa and KEGG pathways were tested for  
174 significance using MaAsLin v0.0.5 (44).

175

176

177

178

179

180 **Genotyping**

181 DNA was extracted from mucosal biopsies and stool samples, and genotyped using Illumina  
182 CoreExome SNP microarrays according to standard protocols. Bead intensity data were processed and  
183 normalized for each sample, and genotypes called using Genome Studio (Illumina). We imputed *HLA-*  
184 *B* genotypes using SNP2HLA (45), as previously reported (46). The distribution of *HLA-B27* and *HLA-*  
185 *DRB1* RA-risk, -protective and -neutral subtypes is available in Supplementary Table 1.

186

187 **RESULTS**

188 16S rRNA profiling and SNP array genotyping was successfully completed for 107 individuals (61  
189 female, 46 male) involving a total of 564 biopsy samples (see Table 1).

190

191 We studied the effect of BMI, gender and sampling site on the gut microbiome to identify relevant  
192 covariates for analysis of AS-associated genes and their association with the gut microbiome.  
193 Considering sample site, striking differences were observed, particularly between the stool samples  
194 and mucosal samples (Figure 1A,  $P < 0.0001$ ). Excluding stool samples, marked difference was still  
195 observed between sites ( $P < 0.0001$ ), but it can be observed that this is mainly driven by differences of  
196 the ileal samples from the colonic mucosal samples (left and right colon, cecum, rectum), which largely  
197 clustered together (Figure 1B).

198

199 Stool samples are much more convenient to obtain than ileal or colonic mucosal samples, which  
200 require an endoscopic procedure for collection. Given the prior evidence of primarily ileal  
201 inflammation in AS (5), we were interested in the relationship between the ileal and stool microbiome.  
202 In this comparison marked differences were observed between sites, though with some overlap seen  
203 on the sPLSDA plot (Supplementary Figure 2,  $P < 0.0001$ ).

204

205

206

207

208

209

210

211

212

213

214

| Site        | Total | Female | Male | HLA-B27<br>Negative | HLA-B27<br>Positive | HLA-DRB1<br>Risk<br>Genotype | HLA-DRB1<br>Protective<br>Genotype | HLA-DRB1<br>Neutral<br>Genotype |
|-------------|-------|--------|------|---------------------|---------------------|------------------------------|------------------------------------|---------------------------------|
| Cecum       | 103   | 59     | 44   | 93                  | 10                  | 34                           | 8                                  | 47                              |
| Ileum       | 90    | 51     | 39   | 80                  | 10                  | 36                           | 8                                  | 45                              |
| Left Colon  | 100   | 57     | 43   | 90                  | 10                  | 33                           | 7                                  | 47                              |
| Rectum      | 91    | 53     | 38   | 81                  | 10                  | 33                           | 7                                  | 41                              |
| Right Colon | 97    | 57     | 40   | 87                  | 10                  | 33                           | 8                                  | 45                              |
| Stool       | 83    | 46     | 37   | 73                  | 10                  | 29                           | 8                                  | 36                              |

215

216 **Table 1:** Number of samples and *HLA-B27* and *HLA-DRB1* shared epitope allele status by site. Note  
217 that different subjects had different numbers of samples obtained, and at no individual site did all  
218 subjects have samples obtained.

219

220

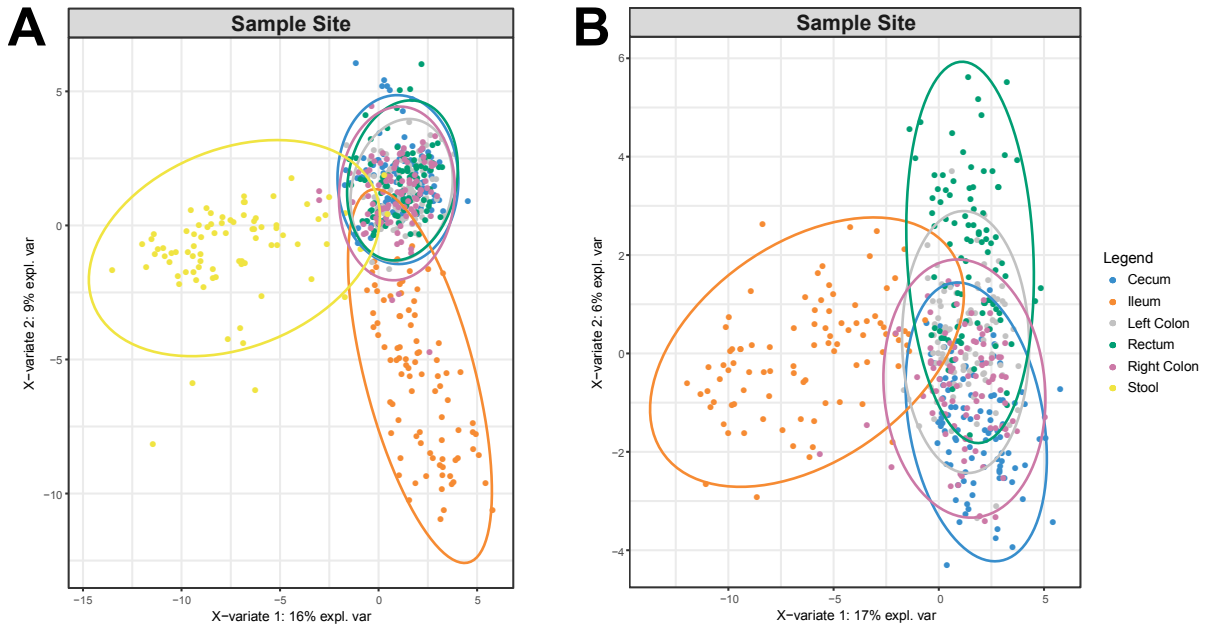

221

222 **Figure 1:** sPLSDA comparing the microbiome composition at various sample sites, showing **A.** marked  
223 difference of stool/luminal site compared with all other sites, which are mucosal, and **B.** in the absence  
224 of stool samples, the ileal site remains distinct from colonic sites. A PCA plot of these results is available  
225 in Supplementary Figure 1.

226

227



228 Several studies have noted an increase (47), decrease (20, 21) or no change (48) in alpha diversity  
229 metrics for AS cases, and an increase (22) or decrease (49) in alpha diversity for RA cases. In the  
230 current study, calculation of rarefied species richness revealed that carriage of *HLA-B27* and *HLA-*  
231 *DRB1* alleles was not associated with differences in alpha diversity, except for stool samples for  
232 which carriage of *HLA-DRB1* RA-risk alleles was associated an increased alpha diversity across both  
233 cohorts (Figure 2).

234  
235

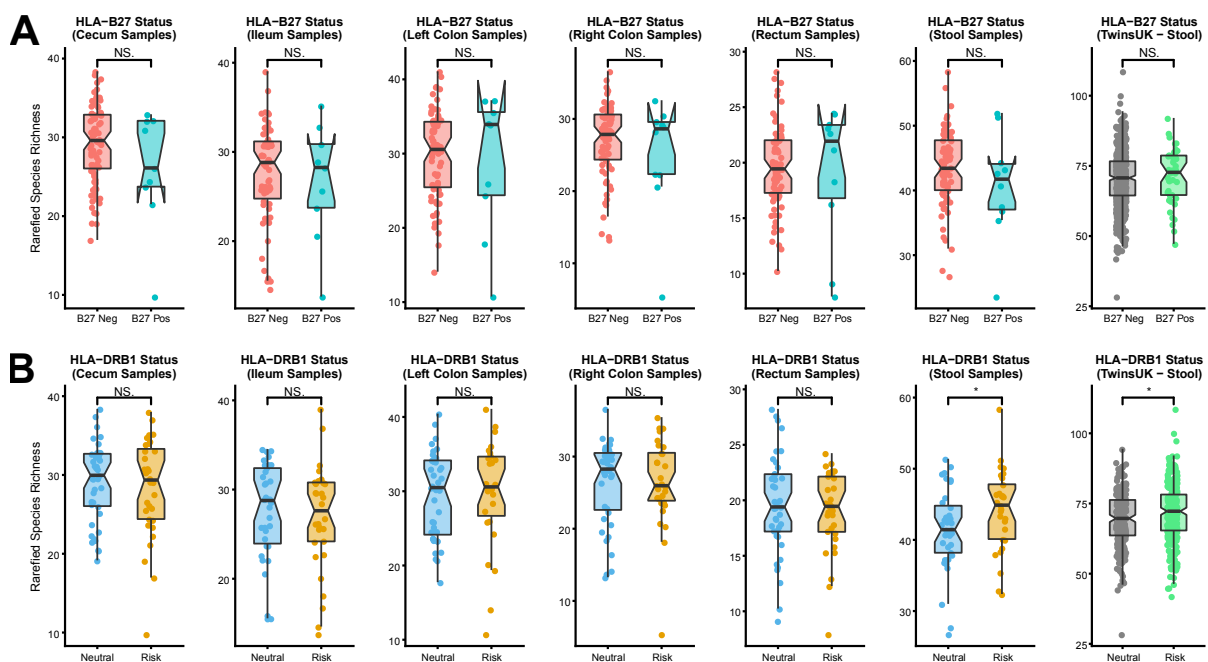

236

237 **Figure 2:** Alpha diversity across each sampling site, and in the TwinsUK cohort **A.** Alpha diversity  
238 according *HLA-B27* status. **B.** Alpha diversity according to *HLA-DRB1* status, revealing increased alpha  
239 diversity in stool samples of both cohorts.

240

241

242 Considering beta diversity via sPLSDA and PERMANOVA, significant association of BMI category was  
243 seen with microbiome composition ( $P=0.0022$ )(Supplementary Figure 3A). This appears to be driven  
244 particularly by the difference of underweight individuals ( $BMI<18.5$ ) compared with other BMI  
245 categories. Removing underweight samples from the analysis, a non-significant trend of association  
246 of BMI category with microbiome composition is seen ( $P=0.078$ )(Supplementary Figure 3B), consistent  
247 with previous reports (50-52).

248 Given the marked gender biases in RA and AS, and evidence in mice that gender related hormonal  
249 differences are associated with differences in the intestinal microbiome (53, 54), we sought to  
250 evaluate the influence of gender on the microbiome in this cohort. Whilst substantial overlap between  
251 males and females was evident (Supplementary Figure 4), significant difference between genders in  
252 microbiome composition was observed (considering all sites,  $P=0.0004$ ). Considering indicator  
253 species, a significant reduction in carriage of *Prevotella* genus in males was observed ( $P=0.005$ ).

254

255 Controlling for BMI and gender, significant differentiation of the microbiome was identified in  
256 individuals carrying *HLA-B27* or RA-risk *HLA-DRB1* alleles (PERMANOVA  $P=0.002$  and  $P=0.0001$ ,  
257 respectively)(Figures 3A and 3B). Despite significant differentiation in terms of beta diversity, there  
258 was typically no difference in alpha diversity (Figure 2), indicating that the underlying host genetics  
259 may affect the overall composition of the microbiome, but not the overall species diversity. In the  
260 TwinsUK cohort, consisting of stool samples, and studying one twin drawn randomly from each twin  
261 pair, association with *HLA-B27* and RA-risk *HLA-DRB1* alleles was also observed ( $P=0.023$  and  $P=0.033$   
262 respectively, Figure 3C). Study of the alternate twin from each pair revealed consistent findings.  
263 Whether the observed differences in taxonomic and functional composition are consistent between  
264 the two cohorts remains an open-ended question as they are confounded by differences in the  
265 experimental approach and the surveyed population.

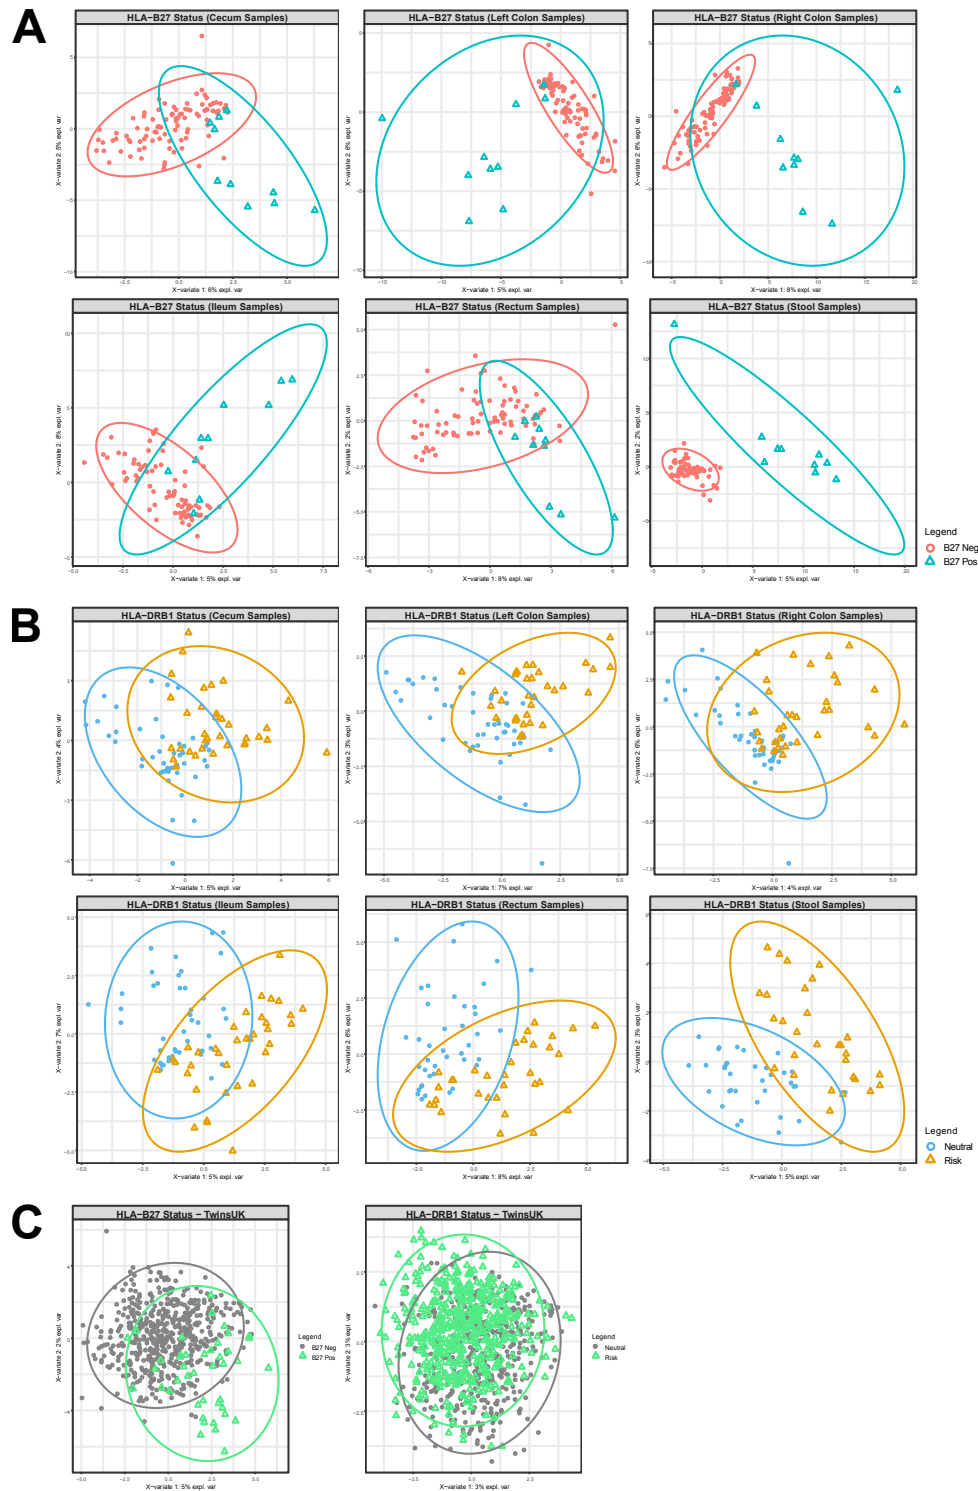

266

267 **Figure 3: A.** sPLSDA comparing the microbiome composition of *HLA-B27* positive and negative  
 268 individuals across each sampling site. Considering all sampling sites and accounting for repeated  
 269 sampling, significant differentiation of the microbiome was observed (PERMANOVA  $P=0.002$ ). **B.**  
 270 sPLSDA comparing individuals carrying the *HLA-DRB1* RA-risk and -neutral genotypes across each  
 271 sampling site. Considering all sites and accounting for repeated sampling, significant differentiation of  
 272 the microbiome was observed (PERMANOVA  $P=0.0001$ ). **C.** sPLSDA plot comparing *HLA-B27* positive  
 273 and negative twins (one twin randomly selected from each twin pair, PERMANOVA  $P=0.023$ ), and *HLA-*  
 274 *DRB1* risk and neutral genotypes (one twin randomly selected from each twin pair, PERMANOVA  
 275  $P=0.033$ ). PCA plots of these results are available in Supplementary Figure 5.

276

277 We tested whether HLA-B alleles associated with AS were also associated with gut microbial profiles.

278 The association of HLA-B alleles with AS is complex, with risk associations observed with *HLA-B27*, -

279 *B13*, -*B40*, -*B47* and -*B51*, and protective associations with *HLA-B7* and -*B57* (55). Of these, only *HLA-*

280 *B27* showed statistically significant association with microbiome profile across both cohorts.

281 Differences in the microbiome composition were more pronounced when comparing risk-associated

282 alleles to protective alleles. For example, when focusing on a subset of data (ileal samples), marginal

283 differentiation for -*B27* ( $P=0.16$ ) and no differentiation for -*B7* ( $P=0.61$ ) was observed, potentially

284 highlighting sample size constraints. However, direct comparison of -*B27* to -*B7* revealed significant

285 differentiation ( $P=0.008$ ).

286

287 *HLA-B27*-positive subjects exhibited reduced carriage ( $P<0.05$ ) of *Bacterioides ovatus* across multiple

288 sites (ileum, cecum, left colon, right colon and stool), as well as *Blautia obeum* (left colon and right

289 colon) and *Dorea formicigenerans* (rectum and stool). Increased carriage of a *Roseburia* species was

290 observed across multiple sites (left colon, right colon, rectum and stool) and family *Neisseriaceae*

291 (cecum and ileum). For subjects with RA-risk *HLA-DRB1* alleles, numerous taxonomic groups were

292 enriched across multiple sites, notably a *Lachnospiraceae* species (ileum, cecum, left colon, right colon

293 and rectum), a *Clostridiaceae* species (left colon, right colon, rectum and stool) *Bifidobacterium*

294 *longum* (cecum, right colon and rectum), amongst many others. Enrichment of *Ruminococcus gnavus*

295 was also observed in the ileum of subjects carrying risk alleles. A full list of differently abundant taxa

296 according to *HLA-B27* and *HLA-DRB1* status are available in Supplementary Tables 2 and 3,

297 respectively. Interestingly, when accounting for false discovery rate, no single taxa was significantly

298 associated with the investigated genotypes, indicating that community-level differences detectable

299 via PERMANOVA may be driven by subtle changes in a high number of taxa, as opposed to marked

300 changes in a select few.

301

302 Considering the inferred metabolic profiles for *HLA-B27* positive and negative subjects, we observed  
303 significant differences ( $P < 0.05$ ) across multiple sites for numerous KEGG pathways (Supplementary  
304 Table 4). Examples include flagellar assembly (ileum, cecum, left colon, right colon and rectum),  
305 alanine metabolism (cecum, ileum, left colon, and right colon), lysine biosynthesis (left and right colon)  
306 and degradation (ileum, rectum and stool) and secondary bile acid biosynthesis (ileum and stool). For  
307 the RA-risk alleles (*HLA-DRB1*), numerous differences in KEGG pathways were observed  
308 (Supplementary Table 5). Examples include thiamine metabolism, the citric acid cycle,  
309 lipopolysaccharide biosynthesis, glycerolipid metabolism biosynthesis of ansamycins, RNA transport  
310 and bacterial chemotaxis, all of which were differentially abundant across every tissue site biopsied.

311 **DISCUSSION**

312 In this study we have demonstrated for the first time that in the absence of disease or treatment, *HLA-*  
313 *B27* and *HLA-DRB1* have significant effects on the gut microbiome in humans. This is consistent with  
314 *HLA-DRB1*-associated observations in mice (56) and the effect of *HLA-DRB1* alleles upon *Prevotella*  
315 *copri* abundance in humans (24). This extends previous demonstrations that AS and RA are  
316 characterized by intestinal dysbiosis by confirming that this is at least in part due to the effects of the  
317 major genetic risk factors for AS and RA, *HLA-B27* and *HLA-DRB1* risk alleles, respectively.

318  
319 We demonstrate a clear distinction in microbiome profile between luminal stool samples and mucosal  
320 samples, as well as between mucosal samples from different intestinal sites. Of particular note,  
321 marked difference was observed between ileal and stool samples. These findings contrast a previous  
322 smaller study, which may not have observed a difference between ileal and colonic biopsies due to  
323 sample size considerations (48). Many studies of the influence of gut microbiome focus on stool  
324 samples, as they are easier to obtain than mucosal samples. The existence of gut inflammation,  
325 particularly involving the ileum, in AS cases has been well documented. Therefore, our findings suggest  
326 that studies of the microbiome in AS and RA, particularly where the aim is to identify the key species  
327 or genetic elements driving or protecting from the disease, should use samples that reflect the site of  
328 inflammation (i.e. at least in AS, ideally the ileal microbiome). As the microbiome profile of stool  
329 samples do not closely correlate with the ileal microbiome, they would not appear to be an optimal  
330 sample to study, although studying IgA coated bacteria isolated from stool samples may prove more  
331 informative (57, 58).

332  
333 Following our initial study, three further studies have now reported on the difference in gut microbial  
334 composition in AS cases and controls. Tito et al (48) in a study of 27 spondyloarthritis patients (i.e. not  
335 necessarily AS) and 15 healthy controls using 16S rRNA profiling report association of carriage of  
336 *Dialister* in ileal or colonic mucosal biopsies with disease activity assessed by the self-reported

337 questionnaire the Bath Ankylosing Spondylitis Disease Activity Index (BASDAI), and Ankylosing  
338 Spondylitis Disease Activity Score (ASDAS). We did not observe *Dialister* in our study and therefore  
339 cannot comment on whether it is associated with *HLA-B27* carriage. Tito et al did not observe  
340 association of the gut microbiome with *HLA-B27* carriage, but the sample size, particularly in healthy  
341 controls, was too small to exclude other than a large effect. Wen et al used shotgun sequencing of  
342 stool samples from in 97 Chinese AS cases and 114 healthy controls, and reported significant dysbiosis  
343 in the AS cases (21). Breban et al (22) used 16S rRNA profiling of the stool microbiome to study 87 +-  
344 patients with axial spondyloarthritis (42 with AS), 69 healthy controls and 28 rheumatoid arthritis  
345 patients. They also report evidence of intestinal dysbiosis in the spondyloarthritis patients, and report  
346 correlation of *Ruminococcus gnavus* carriage with BASDAI. Whilst we did not observe an association  
347 with the carriage of *HLA-B27*, *Ruminococcus gnavus* was noted to be enriched in the ileum of  
348 individuals carrying the *HLA-DRB1* RA-risk alleles (Supplementary Table 3). In a comparison of *HLA-*  
349 *B27* positive and negative siblings (n=22 and 21 respectively), no difference in microbial composition  
350 was noted overall, but *HLA-B27* positive siblings had increased carriage of the *Microcaccaceae* family  
351 (including the species *Rothia mucilaginosa* within it), several *Blautia* and *Ruminococcus* species, and  
352 of *Egerthella lenta*. They also observed a reduced carriage of *Bifidobacterium* and *Odoribacter* species.  
353 Of these we also see reduction in *Blautia obeum*. Although we did not find dysbiotic changes that were  
354 shared with these specific taxa, we note the enrichment of genera within the Lachospiraceae-  
355 Ruminococcaceae grouping in *HLA-B27* carriers was a shared feature of our studies; *Roseburia* and  
356 *Ruminococcus* by Breban et al (22) and *Roseburia*, *Blautia*, *Dorea* and *Oscillospira* in our current study.  
357 These bacteria are known to be enriched within the intestinal mucosa (59), and are plausibly more  
358 immunogenic as a result (60). The differences observed between these studies may relate to analytical  
359 differences such as handling of covariates, disease definition, sample site studied, ethnicity and diet,  
360 and the different methods employed to profile the microbiome. Our study also confirms the significant  
361 effect of gender and BMI category on gut microbial profiles, suggesting that future studies should  
362 control for these covariates. Consistent with a recent study which examined the effect of the host's

363 genetics upon the microbiome of 1,046 healthy individuals (61), numerous correlations between  
364 specific bacterial taxa and the host's genotype do not remain significant following correction for false  
365 discovery rate, thus indicating that HLA molecules may have a more generalized effect upon  
366 microbiome composition as opposed to a marked effect upon specific taxa. Despite this, we note that  
367 many of the  $P < 0.05$  associations occurred across multiple tissue sites. Whilst the chance of a false  
368 positive at a single site might be relatively high, the chances of finding the same association across  
369 multiple sites decreases exponentially, indicating that the results are less likely to be spurious.  
370 Another possibility is that differences in microbial gene content, not necessarily specific taxa, may be  
371 more significant. In the current study, the microbiome's predicted gene content was extrapolated  
372 from the underlying taxonomy, therefore utilization of whole genome sequencing metagenomics  
373 (a.k.a. shotgun metagenomics) to directly profile genetic composition may prove fruitful. This will be  
374 the focus of subsequent studies.

375

376 HLA molecules affect susceptibility to many diseases, most of which are immunologically mediated. In  
377 almost all instances, the mechanism that accounts for that predisposition is not known. The  
378 microbiome has now been implicated in a long list of diseases, many of which are immunologically  
379 mediated. Our studies suggest that HLA molecules could be important factors that contribute to the  
380 heterogeneity of the microbiome and operate at least partially through this mechanism in the  
381 pathogenesis of many different diseases, not just AS and RA. Consistent with this hypothesis, HLA-  
382 microbiome associations have been described in reactive arthritis (62), IBD (63), celiac disease (64)  
383 and in healthy individuals (24, 65).

384

385 The hypothesized metabolic changes imbued by dysbiosis in our current work are of interest in light  
386 of a recent study by our group in the *HLA-B27* transgenic rat model of spondyloarthritis (66). We  
387 observe a number of *HLA-B27* dependent metabolic changes in this model that include enrichment of  
388 bile acid metabolism, lysine metabolism, fatty acid metabolism and tryptophan metabolism. All of



389 these pathways were predicted to be enriched in *HLA-B27* positive individuals in our current study  
390 (Supplementary Table 4). Importantly, *HLA-B27*-dependent dysbiosis can be observed prior to the  
391 onset of disease in this model. Thus, our human and rat studies support the hypothesis that *HLA-B27*  
392 dependent dysbiosis is a preceding event in AS pathogenesis and may not merely be secondary to  
393 disease.

394

395 In conclusion, this study demonstrates that *HLA-B27* and RA-associated *HLA-DRB1* allele carriage in  
396 humans influences the gut microbiome. In association with the replicated demonstration of intestinal  
397 changes in microbiome in AS, this is consistent with disease models in which HLA molecules interact  
398 with the gut microbiome to cause disease. Different models as to how this may occur include effects  
399 of *HLA-B27* to favour a more inflammatory gut microbiome, increased invasiveness of the gut mucosa  
400 in *HLA-B27* carriers, and/or aberrant immunological responses to bacteria in *HLA-B27* carriers. Similar  
401 hypotheses may explain the role of *HLA-DRB1* in driving the immunopathogenesis of RA. Whichever  
402 of these models is correct, the data presented here support further research in this field, including  
403 into whether manipulation of the gut microbiome may be therapeutic in AS or RA, or even potentially  
404 capable of preventing disease in at risk subjects.

405 **ACKNOWLEDGEMENTS**

406 MAB is funded by a National Health and Medical Research Council (Australia) Senior Principal Research  
407 Fellowship. This work was funded by a National Health and Medical Research Council (Australia)  
408 project grant (reference APP1065509). MA and JTR receive funding from the Spondylitis Association  
409 of America and the Rheumatology Research Foundation and from NIH Grant RO1 EY029266. TDS is a  
410 National Institute for Health Research (NIHR) senior investigator. TwinsUK is funded by the Wellcome  
411 Trust, Medical Research Council, CDRF, Arthritis Research UK, European Union, the NIHR – funded  
412 Clinical Research Facility and Biomedical Research Centre based at Guy’s, and St. Thomas’ NHS  
413 Foundation Trust in partnership with King’s College London (Grant code WT081878MA). JTR receives  
414 funding from the William and Mary Bauman Foundation, the Stan and Madelle Family Trust, and  
415 Research to Prevent Blindness. This study was funded in part by the OHSU Foundation (Collins Medical  
416 Trust) to JTR. LK receives funding supported by the Eunice Kennedy Shriver National Institute Of Child  
417 Health & Human Development of the National Institutes of Health under Award Number  
418 K12HD043488. We wish to acknowledge Dr. Erica Roberson, MD for her valuable contribution to study  
419 design; Patrick Stauffer and Sean Davin for technical assistance; and all OHSU patients and staff whom  
420 helped contribute samples for this study.

421 **REFERENCES**

- 422 1. Brown MA, Kennedy LG, MacGregor AJ, Darke C, Duncan E, Shatford JL, et al.  
423 Susceptibility to ankylosing spondylitis in twins: the role of genes, HLA, and the  
424 environment. *Arthritis Rheum.* 1997;40(10):1823-8.
- 425 2. Pedersen OB, Svendsen AJ, Ejstrup L, Skytthe A, Harris JR, Junker P. Ankylosing  
426 spondylitis in Danish and Norwegian twins: occurrence and the relative importance of  
427 genetic vs. environmental effectors in disease causation. *Scand J Rheumatol.*  
428 2008;37(2):120-6.
- 429 3. MacGregor AJ, Snieder H, Rigby AS, Koskenvuo M, Kaprio J, Aho K, et al.  
430 Characterizing the quantitative genetic contribution to rheumatoid arthritis using data  
431 from twins. *Arthritis Rheum.* 2000;43(1):30-7.
- 432 4. van der Woude D, Houwing-Duistermaat JJ, Toes RE, Huizinga TW, Thomson W,  
433 Worthington J, et al. Quantitative heritability of anti-citrullinated protein antibody-  
434 positive and anti-citrullinated protein antibody-negative rheumatoid arthritis. *Arthritis*  
435 *Rheum.* 2009;60(4):916-23.
- 436 5. Mielants H, Veys EM, Cuvelier C, De Vos M, Botelberghe L. HLA-B27 related  
437 arthritis and bowel inflammation. Part 2. Ileocolonoscopy and bowel histology in  
438 patients with HLA-B27 related arthritis. *J Rheumatol.* 1985;12(2):294-8.
- 439 6. Ciccia F, Accardo-Palumbo A, Alessandro R, Rizzo A, Principe S, Peralta S, et al.  
440 Interleukin-22 and interleukin-22-producing NKp44+ natural killer cells in subclinical  
441 gut inflammation in ankylosing spondylitis. *Arthritis Rheum.* 2012;64(6):1869-78.
- 442 7. Martinez-Gonzalez O, Cantero-Hinojosa J, Paule-Sastre P, Gomez-Magan JC,  
443 Salvatierra-Rios D. Intestinal Permeability in Patients with Ankylosing Spondylitis and  
444 their healthy relatives. *Rheumatology.* 1994;33(7):644-7.
- 445 8. Mielants H, De Vos M, Goemaere S, Schelstraete K, Cuvelier C, Goethals K, et al.  
446 Intestinal mucosal permeability in inflammatory rheumatic diseases. II. Role of disease.  
447 *J Rheumatol.* 1991;18(3):394-400.
- 448 9. Morris AJ, Howden CW, Robertson C, Duncan A, Torley H, Sturrock RD, et al.  
449 Increased intestinal permeability in ankylosing spondylitis--primary lesion or drug  
450 effect? *Gut.* 1991;32(12):1470-2.
- 451 10. Vaile J, Meddings J, Yacyshyn B, AS. R, Maksymowych W. Bowel permeability and  
452 CD45RO expression on circulating CD20+ B cells in patients with ankylosing spondylitis  
453 and their relatives. *Journal of Rheumatology.* 1999  
454 26(1):128-35.
- 455 11. Bjarnason I, Helgason KO, Geirsson AJ, Sigthorsson G, Reynisdottir I,  
456 Gudbjartsson D, et al. Subclinical intestinal inflammation and sacroiliac changes in  
457 relatives of patients with ankylosing spondylitis. *Gastroenterology.* 2003;125(6):1598-  
458 605.
- 459 12. Palm O, Moum B, Ongre A, Gran JT. Prevalence of ankylosing spondylitis and  
460 other spondyloarthropathies among patients with inflammatory bowel disease: a  
461 population study (the IBSEN study). *J Rheumatol.* 2002;29(3):511-5.
- 462 13. Orchard TR, Holt H, Bradbury L, Hammersma J, McNally E, Jewell DP, et al. The  
463 prevalence, clinical features and association of HLA-B27 in sacroiliitis associated with  
464 established Crohn's disease. *Alimentary Pharmacology & Therapeutics.*  
465 2009;29(2):193-7.
- 466 14. Thjodleifsson B, Geirsson AJ, Bjornsson S, Bjarnason I. A common genetic  
467 background for inflammatory bowel disease and ankylosing spondylitis: a genealogic  
468 study in Iceland. *Arthritis Rheum.* 2007;56(8):2633-9.

- 469 15. Ellinghaus D, Jostins L, Spain SL, Cortes A, Bethune J, Han B, et al. Analysis of five  
470 chronic inflammatory diseases identifies 27 new associations and highlights disease-  
471 specific patterns at shared loci. *Nature genetics*. 2016;48(5):510-8.
- 472 16. Parkes M, Cortes A, van Heel DA, Brown MA. Genetic insights into common  
473 pathways and complex relationships among immune-mediated diseases. *Nat Rev Genet*.  
474 2013;14(9):661-73.
- 475 17. Cua DJ, Sherlock JP. Autoimmunity's collateral damage: Gut microbiota strikes  
476 'back'. *Nature medicine*. 2011;17(9):1055-6.
- 477 18. Costello ME, Elewaut D, Kenna TJ, Brown MA. Microbes, the gut and ankylosing  
478 spondylitis. *Arthritis research & therapy*. 2013;15(3):214.
- 479 19. Rosenbaum JT, Asquith M. The microbiome and HLA-B27-associated acute  
480 anterior uveitis. *Nature Reviews Rheumatology*. 2018:1.
- 481 20. Costello ME, Ciccia F, Willner D, Warrington N, Robinson PC, Gardiner B, et al.  
482 Brief Report: Intestinal Dysbiosis in Ankylosing Spondylitis. *Arthritis & rheumatology*.  
483 2015;67(3):686-91.
- 484 21. Wen C, Zheng Z, Shao T, Liu L, Xie Z, Le Chatelier E, et al. Quantitative  
485 metagenomics reveals unique gut microbiome biomarkers in ankylosing spondylitis.  
486 *Genome Biol*. 2017;18(1):142.
- 487 22. Breban M, Tap J, Leboime A, Said-Nahal R, Langella P, Chiochia G, et al. Faecal  
488 microbiota study reveals specific dysbiosis in spondyloarthritis. *Ann Rheum Dis*.  
489 2017;76(9):1614-22.
- 490 23. Gill T, Asquith M, Brooks SR, Rosenbaum JT, Colbert RA. Effects of HLA-B27 on  
491 Gut Microbiota in Experimental Spondyloarthritis Implicate an Ecological Model of  
492 Dysbiosis. *Arthritis & rheumatology*. 2017.
- 493 24. Scher JU, Sczesnak A, Longman RS, Segata N, Ubeda C, Bielski C, et al. Expansion  
494 of intestinal *Prevotella copri* correlates with enhanced susceptibility to arthritis. *Elife*.  
495 2013;2:e01202.
- 496 25. Zhang X, Zhang D, Jia H, Feng Q, Wang D, Liang D, et al. The oral and gut  
497 microbiomes are perturbed in rheumatoid arthritis and partly normalized after  
498 treatment. *Nature medicine*. 2015;21(8):895-905.
- 499 26. Jubair WK, Hendrickson JD, Severs EL, Schulz HM, Adhikari S, Ir D, et al.  
500 Modulation of Inflammatory Arthritis in Mice by Gut Microbiota Through Mucosal  
501 Inflammation and Autoantibody Generation. *Arthritis & rheumatology*.  
502 2018;70(8):1220-33.
- 503 27. Rogier R, Evans-Marin H, Manasson J, van der Kraan PM, Walgreen B, Helsen MM,  
504 et al. Alteration of the intestinal microbiome characterizes preclinical inflammatory  
505 arthritis in mice and its modulation attenuates established arthritis. *Sci Rep*.  
506 2017;7(1):15613.
- 507 28. Spor A, Koren O, Ley R. Unravelling the effects of the environment and host  
508 genotype on the gut microbiome. *Nat Rev Micro*. 2011;9(4):279-90.
- 509 29. Benson AK, Kelly SA, Legge R, Ma F, Low SJ, Kim J, et al. Individuality in gut  
510 microbiota composition is a complex polygenic trait shaped by multiple environmental  
511 and host genetic factors. *Proceedings of the National Academy of Sciences*.  
512 2010;107(44):18933-8.
- 513 30. Goodrich JK, Davenport ER, Beaumont M, Jackson MA, Knight R, Ober C, et al.  
514 Genetic Determinants of the Gut Microbiome in UK Twins. *Cell Host Microbe*.  
515 2016;19(5):731-43.
- 516 31. Kenna TJ, Brown MA. Immunopathogenesis of ankylosing spondylitis. *Int J Clin*  
517 *Rheumatol*. 2013;8(2):265-74.

- 518 32. Rosenbaum JT, Davey MP. Time for a gut check: Evidence for the hypothesis that  
519 HLA-B27 predisposes to ankylosing spondylitis by altering the microbiome. *Arthritis &*  
520 *Rheumatism*. 2011;63(11):3195-8.
- 521 33. Asquith MJ, Stauffer P, Davin S, Mitchell C, Lin P, Rosenbaum JT. Perturbed  
522 Mucosal Immunity and Dysbiosis Accompany Clinical Disease in a Rat Model of  
523 Spondyloarthritis. *Arthritis & rheumatology*. 2016;68(9):2151-62.
- 524 34. Lin P, Bach M, Asquith M, Lee AY, Akileswaran L, Stauffer P, et al. HLA-B27 and  
525 human beta2-microglobulin affect the gut microbiota of transgenic rats. *PLoS One*.  
526 2014;9(8):e105684.
- 527 35. Caminer AC, Haberman R, Scher JU. Human microbiome, infections, and  
528 rheumatic disease. *Clin Rheumatol*. 2017;36(12):2645-53.
- 529 36. Goodrich Julia K, Waters Jillian L, Poole Angela C, Sutter Jessica L, Koren O,  
530 Blekhman R, et al. Human Genetics Shape the Gut Microbiome. *Cell*. 2014;159(4):789-  
531 99.
- 532 37. Caporaso JG, Kuczynski J, Stombaugh J, Bittinger K, Bushman FD, Costello EK, et  
533 al. QIIME allows analysis of high-throughput community sequencing data. *Nat Meth*.  
534 2010;7(5):335-6.
- 535 38. DeSantis TZ, Hugenholtz P, Larsen N, Rojas M, Brodie EL, Keller K, et al.  
536 Greengenes, a chimera-checked 16S rRNA gene database and workbench compatible  
537 with ARB. *Appl Environ Microbiol*. 2006;72(7):5069-72.
- 538 39. Edgar RC. Search and clustering orders of magnitude faster than BLAST.  
539 *Bioinformatics*. 2010;26(19):2460-1.
- 540 40. Lê Cao K-A, Costello M-E, Lakis VA, Bartolo F, Chua X-Y, Brazeilles R, et al. MixMC:  
541 a multivariate statistical framework to gain insight into microbial communities. *PloS*  
542 *one*. 2016;11(8):e0160169.
- 543 41. Dixon PJJ. VEGAN, a package of R functions for community ecology.  
544 2003;14(6):927-30.
- 545 42. Langille MG, Zaneveld J, Caporaso JG, McDonald D, Knights D, Reyes JA, et al.  
546 Predictive functional profiling of microbial communities using 16S rRNA marker gene  
547 sequences. *Nat Biotechnol*. 2013;31(9):814-21.
- 548 43. Abubucker S, Segata N, Goll J, Schubert AM, Izard J, Cantarel BL, et al. Metabolic  
549 reconstruction for metagenomic data and its application to the human microbiome.  
550 *PLoS Comput Biol*. 2012;8(6):e1002358.
- 551 44. Morgan XC, Tickle TL, Sokol H, Gevers D, Devaney KL, Ward DV, et al. Dysfunction  
552 of the intestinal microbiome in inflammatory bowel disease and treatment. *Genome*  
553 *Biol*. 2012;13(9):R79.
- 554 45. Jia X, Han B, Onengut-Gumuscu S, Chen WM, Concannon PJ, Rich SS, et al.  
555 Imputing amino acid polymorphisms in human leukocyte antigens. *PLoS One*.  
556 2013;8(6):e64683.
- 557 46. Cortes A, Pulit SL, Leo PJ, Pointon JJ, Robinson PC, Weisman MH, et al. Major  
558 histocompatibility complex associations of ankylosing spondylitis are complex and  
559 involve further epistasis with ERAP1. *Nat Commun*. 2015;6:7146.
- 560 47. Chen Z, Qi J, Zheng X, Wu X, Li X, Gu J. AB0147 Faecal microbiota study identifies  
561 dysbiosis in ankylosing spondylitis patients. *BMJ Publishing Group Ltd*; 2018.
- 562 48. Tito RY, Cypers H, Joossens M, Varkas G, Van Praet L, Glorieus E, et al. Brief  
563 Report: Dialister as a Microbial Marker of Disease Activity in Spondyloarthritis. *Arthritis*  
564 *& rheumatology*. 2017;69(1):114-21.
- 565 49. Wu X, Liu J, Xiao L, Lu A, Zhang GJO, Cartilage. Alterations of Gut Microbiome in  
566 Rheumatoid Arthritis. 2017;25:S287-S8.

- 567 50. Turnbaugh PJ, Bäckhed F, Fulton L, Gordon JI. Diet-induced obesity is linked to  
568 marked but reversible alterations in the mouse distal gut microbiome. *Cell host &*  
569 *microbe*. 2008;3(4):213-23.
- 570 51. Turnbaugh PJ, Hamady M, Yatsunencko T, Cantarel BL, Duncan A, Ley RE, et al. A  
571 core gut microbiome in obese and lean twins. *nature*. 2009;457(7228):480.
- 572 52. Turnbaugh PJ, Ley RE, Mahowald MA, Magrini V, Mardis ER, Gordon JI. An  
573 obesity-associated gut microbiome with increased capacity for energy harvest. *nature*.  
574 2006;444(7122):1027.
- 575 53. Markle JGM, Frank DN, Mortin-Toth S, Robertson CE, Feazel LM, Rolle-Kampczyk  
576 U, et al. Sex Differences in the Gut Microbiome Drive Hormone-Dependent Regulation of  
577 Autoimmunity. *Science*. 2013;339(6123):1084-8.
- 578 54. Yurkovetskiy L, Burrows M, Khan Aly A, Graham L, Volchkov P, Becker L, et al.  
579 Gender Bias in Autoimmunity Is Influenced by Microbiota. *Immunity*. 2013;39(2):400-  
580 12.
- 581 55. Cortes A, Maksymowych WP, Wordsworth BP, Inman RD, Danoy P, Rahman P, et  
582 al. Association study of genes related to bone formation and resorption and the extent of  
583 radiographic change in ankylosing spondylitis. *Ann Rheum Dis*. 2015;74(7):1387-93.
- 584 56. Gomez A, Luckey D, Yeoman CJ, Marietta EV, Miller MEB, Murray JA, et al. Loss of  
585 sex and age driven differences in the gut microbiome characterize arthritis-susceptible\*  
586 0401 mice but not arthritis-resistant\* 0402 mice. *PloS one*. 2012;7(4):e36095.
- 587 57. Palm NW, de Zoete MR, Cullen TW, Barry NA, Stefanowski J, Hao L, et al.  
588 Immunoglobulin A coating identifies colitogenic bacteria in inflammatory bowel  
589 disease. *Cell*. 2014;158(5):1000-10.
- 590 58. Viladomiu M, Kivolowitz C, Abdulhamid A, Dogan B, Victorio D, Castellanos JG, et  
591 al. IgA-coated *E. coli* enriched in Crohn's disease spondyloarthritis promote TH17-  
592 dependent inflammation. *Science translational medicine*. 2017;9(376):eaaf9655.
- 593 59. Nava GM, Friedrichsen HJ, Stappenbeck TS. Spatial organization of intestinal  
594 microbiota in the mouse ascending colon. *ISME J*. 2011;5(4):627-38.
- 595 60. Atarashi K, Tanoue T, Ando M, Kamada N, Nagano Y, Narushima S, et al. Th17 Cell  
596 Induction by Adhesion of Microbes to Intestinal Epithelial Cells. *Cell*. 2015;163(2):367-  
597 80.
- 598 61. Rothschild D, Weissbrod O, Barkan E, Kurilshikov A, Korem T, Zeevi D, et al.  
599 Environment dominates over host genetics in shaping human gut microbiota. *Nature*.  
600 2018;555(7695):210.
- 601 62. Manasson J, Shen N, Garcia Ferrer HR, Ubeda C, Iraheta I, Heguy A, et al. Gut  
602 microbiota perturbations in reactive arthritis and postinfectious spondyloarthritis.  
603 *Arthritis & rheumatology*. 2018;70(2):242-54.
- 604 63. Imhann F, Vila AV, Bonder MJ, Fu J, Gevers D, Visschedijk MC, et al. Interplay of  
605 host genetics and gut microbiota underlying the onset and clinical presentation of  
606 inflammatory bowel disease. *Gut*. 2018;67(1):108-19.
- 607 64. Olivares M, Neef A, Castillejo G, Palma GD, Varea V, Capilla A, et al. The HLA-DQ2  
608 genotype selects for early intestinal microbiota composition in infants at high risk of  
609 developing coeliac disease. *Gut*. 2015;64(3):406-17.
- 610 65. Wang J, Thingholm LB, Skieceviciene J, Rausch P, Kummen M, Hov JR, et al.  
611 Genome-wide association analysis identifies variation in vitamin D receptor and other  
612 host factors influencing the gut microbiota. *Nature genetics*. 2016;48(11):1396.
- 613 66. Asquith M, Davin S, Stauffer P, Michell C, Janowitz C, Lin P, et al. Intestinal  
614 Metabolites Are Profoundly Altered in the Context of HLA-B27 Expression and

615 Functionally Modulate Disease in a Rat Model of Spondyloarthritis. *Arthritis &*  
616 *rheumatology*. 2017;69(10):1984-95.  
617
